# Supplementary material
Source: publisher site journal article supplement (https://www.spandidos-publications.com/4877/downloadSupplementary)
Supplement: Supplementary file 1 [file downloadSupplementary]

## Sheet: Sheet1
Table SII. Sequence of primers.
Oligonucleotides	5'-3'
RBM10, Forward Primer	ATGGAGTATGAAAGACGTGGTGG
RBM10, reverse primer	TCCCGGTAGTCGTGGTCTC
Bad, Forward Primer	CCCAGAGTTTGAGCCGAGTG
Bad, reverse primer	CCCATCCCTTCGTCGTCCT
Bcl-2, Forward Primer	GGTGGGGTCATGTGTGTGG
Bcl-2, reverse primer	CGGTTCAGGTACTCAGTCATCC
Bax, Forward Primer	CCCGAGAGGTCTTTTTCCGAG
Bax, reverse primer	CCAGCCCATGATGGTTCTGAT
Caspase 3, Forward Primer	CATGGAAGCGAATCAATGGACT
Caspase 3, reverse primer	CTGTACCAGACCGAGATGTCA
RBM, RNA binding motif 10
